# Supplementary material for: Smartphone-based turbidity reader
Source: PubMed Central journal article supplement (PMC6934863; doi:10.1038/s41598-019-56474-z), 2019-12-27
Supplement: 41598_2019_56474_MOESM1_ESM.pdf [file 41598_2019_56474_MOESM1_ESM.pdf]

# Supplementary Information

## Smartphone-based turbidity reader

Hatice Ceylan Koydemir<sup>1,2,3,†</sup>, Simran Rajpal<sup>1,†</sup>, Esin Gumustekin<sup>4</sup>, Doruk Karınca<sup>5</sup>, Kyle Liang<sup>5</sup>,

Zoltan Gorocs<sup>1,2,3</sup>, Derek Tseng<sup>1,2,3</sup>, and Aydogan Ozcan<sup>1,2,3,\*</sup>

<sup>1</sup>Biengineering Department, University of California Los Angeles, 90095, CA, USA

<sup>2</sup>Electrical and Computer Engineering Department, University of California, Los Angeles, 90095, CA, USA

<sup>3</sup>California NanoSystems Institute, Los Angeles, 90095, CA, USA

<sup>4</sup>Microbiology, Immunology and Molecular Genetics, University of California Los Angeles, 90095, CA, USA

<sup>5</sup>Computer Science and Engineering Department, University of California, Los Angeles, 90095, CA, USA

†These authors contributed equally to this work.

\*Corresponding author: [ozcan@ucla.edu](mailto:ozcan@ucla.edu)

|                  |                                                                                                                                                                                    |
|------------------|------------------------------------------------------------------------------------------------------------------------------------------------------------------------------------|
| <b>Figure S1</b> | Schematics illustrating the mechanism of (a) nephelometric turbidity measurement, (b) transmittance based turbidity measurement for a liquid sample in a disposable glass cuvette. |
| <b>Table S1</b>  | Calibration data used in Figure 4.                                                                                                                                                 |
| <b>Table S2</b>  | Precision and accuracy data of the reader at different turbidity levels.                                                                                                           |

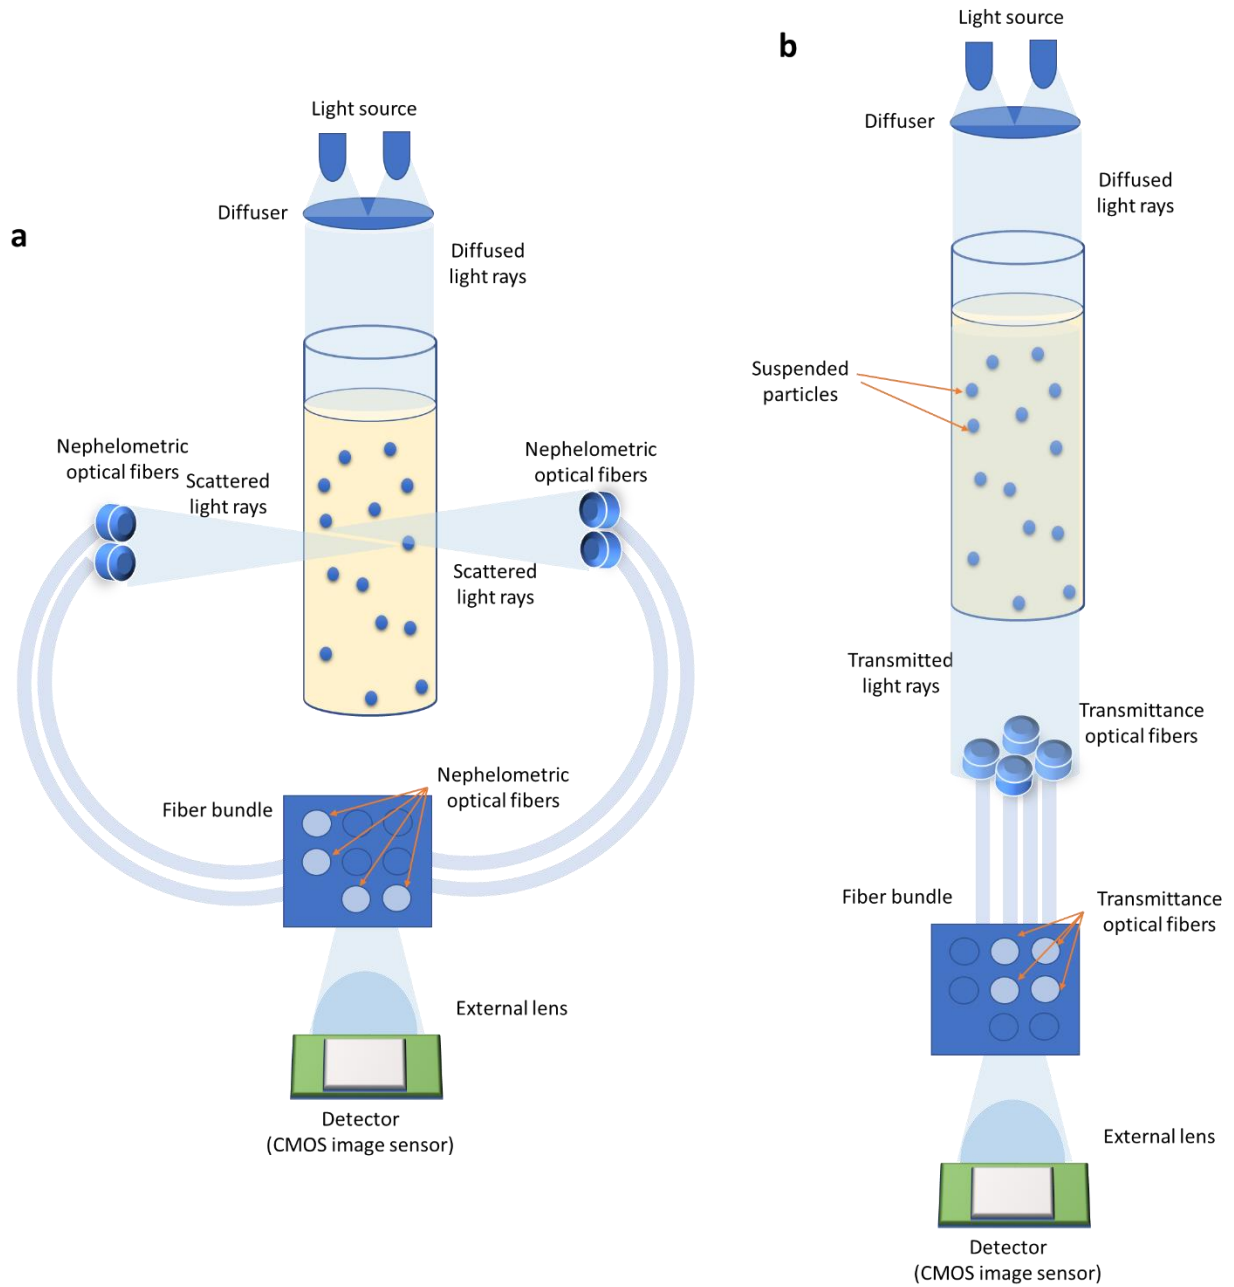

**Figure S1.** Schematics illustrating the mechanism of (a) nephelometric turbidity measurement, (b) transmittance based turbidity measurement for a liquid sample in a disposable glass cuvette.

**Table S1.** Calibration data used in Figure 4.

| NTU                                                      | $I_R$    | $I_T$    | $I_{R,\sigma}$ | $I_{T,\sigma}$ |
|----------------------------------------------------------|----------|----------|----------------|----------------|
| 0.05                                                     | 6.4413   | 133.5465 | 0.1993         | 1.0363         |
| 0.8                                                      | 8.5412   | 170.2480 | 0.0838         | 3.5043         |
| 0.95                                                     | 10.0402  | 159.0785 | 0.3041         | 3.9844         |
| 1.4                                                      | 10.5031  | 158.3732 | 0.1127         | 6.5292         |
| 2.1                                                      | 11.3889  | 162.3609 | 0.2578         | 4.2214         |
| 3.3                                                      | 12.2540  | 164.0013 | 0.2094         | 3.2994         |
| 7.1                                                      | 14.3217  | 173.1743 | 0.4304         | 3.7294         |
| 8                                                        | 13.3665  | 146.1655 | 0.2927         | 2.4395         |
| 10                                                       | 16.1618  | 163.9319 | 0.4321         | 4.0656         |
| 12                                                       | 15.79586 | 144.218  | 0.2319         | 6.3517         |
| 15                                                       | 16.41719 | 142.3204 | 0.1409         | 1.3350         |
| 100                                                      | 51.53643 | 124.3573 | 0.5966         | 1.4549         |
| 180                                                      | 75.0622  | 131.2323 | 1.0467         | 5.6458         |
| 240                                                      | 91.85185 | 106.7126 | 1.0392         | 6.6322         |
| 280                                                      | 102.3085 | 90.90978 | 1.9113         | 5.2107         |
| 320                                                      | 107.5798 | 71.45283 | 0.7959         | 5.4751         |
| 370                                                      | 132.3294 | 63.38244 | 0.7793         | 3.0877         |
| 400                                                      | 142.2062 | 53.45454 | 0.5336         | 2.2884         |
| 450                                                      | 150.6569 | 41.62234 | 0.8552         | 3.3755         |
| 500                                                      | 162.7766 | 33.93486 | 0.4345         | 1.5979         |
| 750                                                      | 162.0428 | 11.1522  | 0.7980         | 0.4009         |
| 2000                                                     | 121.401  | 12.35747 | 4.1239         | 0.8230         |
| $\sigma$ : standard deviation<br>$I$ : average intensity |          |          |                |                |

**Table S2.** Precision and accuracy data of the reader at different turbidity levels.

| True Value (NTU) | Calculated Mean Turbidity (NTU) | Standard Deviation |
|------------------|---------------------------------|--------------------|
| 0.05             | 0.24                            | 0.02               |
| 0.8              | 0.60                            | 0.02               |
| 0.95             | 1.14                            | 0.14               |
| 1.4              | 1.37                            | 0.07               |
| 2.1              | 2.01                            | 0.22               |
| 3.3              | 4.01                            | 0.44               |
| 7.1              | 8.38                            | 0.91               |
| 8                | 6.36                            | 0.62               |
| 10               | 12.26                           | 0.91               |
| 12               | 11.49                           | 0.49               |
| 15               | 12.80                           | 0.30               |
| 100              | 114.32                          | 1.89               |
| 180              | 188.80                          | 3.31               |
| 240              | 241.96                          | 3.29               |
| 280              | 275.07                          | 6.05               |
| 320              | 294.49                          | 21.96              |
| 370              | 331.52                          | 16.47              |
| 400              | 393.94                          | 17.16              |
| 450              | 510.39                          | 41.48              |
| 500              | 625.32                          | 30.01              |
| 2000             | 1748.86                         | 114.23             |
